# Supplementary material for: Valorization of Kiwi Peels: Fractionation, Bioactives Analyses and Hypotheses on Complete Peels Recycle
Source: MDPI journal article supplement (doi:10.3390/foods11040589), 2022-02-18
Supplement: s1 [file s1]

# Valorization of kiwi peels: fractionation, bioactives analyses and hypotheses on complete peels recycle

Francesco Cairone<sup>1</sup>, Stefania Garzoli<sup>1</sup>, Luigi Menghini<sup>2</sup>, Giovanna Simonetti<sup>3</sup>, Maria Antonietta Casadei<sup>1</sup>, Laura Di Muzio<sup>1</sup> and Stefania Cesa<sup>1\*</sup>

<sup>1</sup> Department of Drug Chemistry and Technology, “La Sapienza” University of Rome, Piazzale Aldo Moro, 5, 00185 Rome, Italy; francesco.cairone@uniroma1.it (F.C.); stefania.garzoli@uniroma1.it (S.G.); mariaantonia.casadei@uniroma1.it (A.C.); laura.dimuzio@uniroma1.it (L.D.)

<sup>2</sup> Department of Pharmacy, University “G. d’Annunzio, Via dei Vestini 31, 66100 Chieti, Italy; luigi.menghini@unich.it (L.M.)

<sup>3</sup> Department of Environmental Biology “La Sapienza” University of Rome, Piazzale Aldo Moro, 5, 00185 Rome, Italy; giovanna.simonetti@uniroma1.it (G.S.)

\* Correspondence: stefania.cesa@uniroma1.it; Tel.: +39-06-4991-3198

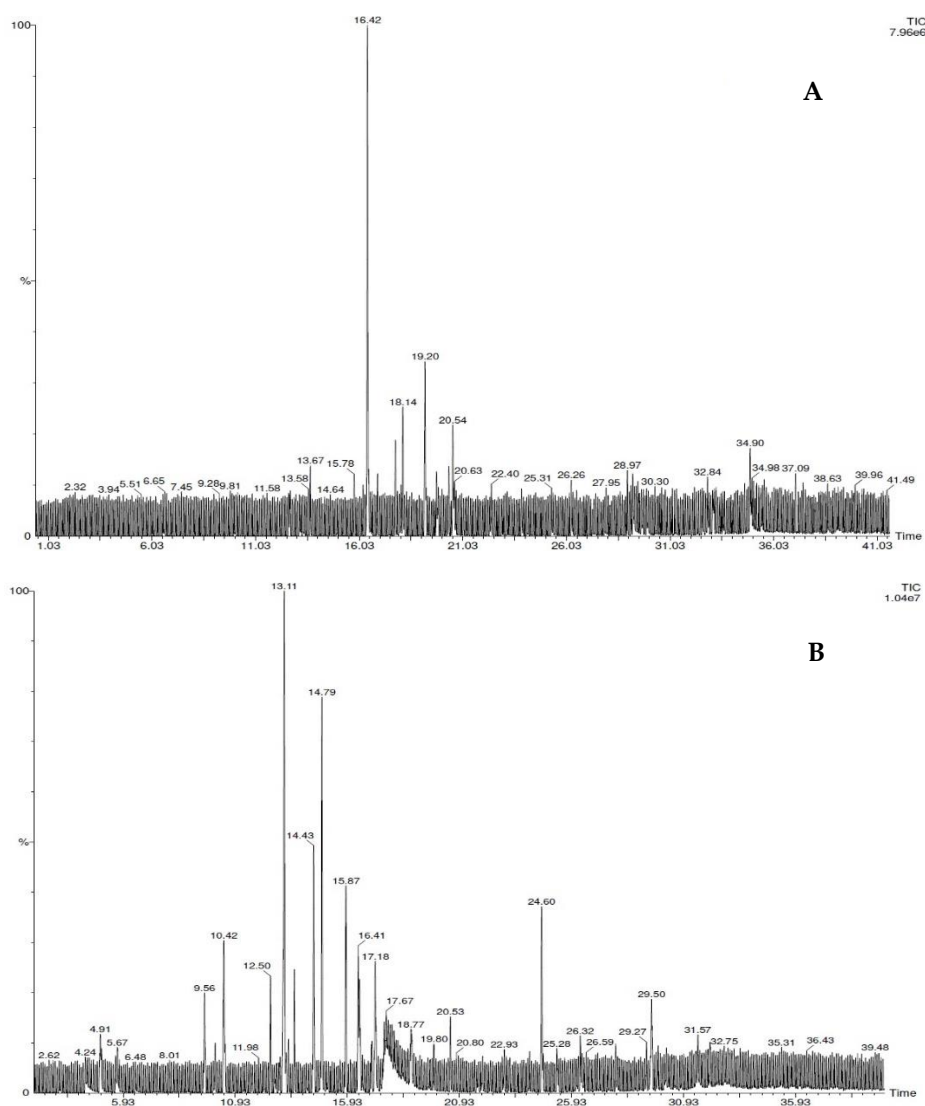

**Figure S1.** GC/FID chromatograms of kiwi peels “selected” (Panel A) and “commercial” (Panel B)

| Selected peels      |       | Commercial peels                           |       |
|---------------------|-------|--------------------------------------------|-------|
| Compound            | %     | Compound                                   | %     |
| 4-Vinyl-imidazole   | 4,35  | 2-Hexenal                                  | 2,83  |
| Cyclopentanmethanol | 4,45  | Linalool oxide                             | 3,59  |
| Myrcene             | 9,85  | Ocimenol                                   | 3,68  |
| $\alpha$ -Terpineol | 15,67 | Pyran 2-ethenyltetrahydro-2,6,6-trimethyl- | 4,36  |
| Ocimenol            | 16,25 | $\beta$ -Myrcene                           | 5,12  |
| Linalool            | 49,44 | Hexaydrofarnesyl acetone                   | 5,34  |
|                     |       | 6-Hepten-2-ol, 2,6-dimethyl-               | 6,68  |
|                     |       | $\beta$ -Damascenone                       | 6,85  |
|                     |       | Diethyl phthalate                          | 7,41  |
|                     |       | p-Menth-1-en-9-al                          | 8,17  |
|                     |       | Myrcenol                                   | 21,71 |
|                     |       | $\alpha$ -Terpineol                        | 24,27 |

| HEsel                                  |       | HEcom                                  |       |
|----------------------------------------|-------|----------------------------------------|-------|
| Compound                               | %     | Compound                               | %     |
| Hexane, 3,3-dimethyl-                  | 1,81  | Nonanal                                | 1,25  |
| 3-Ethyl-3-methylheptane                | 1,09  | 2-Bromononane                          | 1,72  |
| Undecane, 2-methyl-                    | 5,29  | Decane, 2,9-dimethyl-                  | 3,57  |
| Undecane, 4,7-dimethyl-                | 3,40  | 3,7,11,15-Tetramethyl-2-hexadecen-1-ol | 35,86 |
| Undecane, 3,8-dimethyl-                | 10,07 | Hexadecanoic acid                      | 45,67 |
| 3,7,11,15-Tetramethyl-2-hexadecen-1-ol | 19,89 | Hexadecanoic, ethyl ester              | 11,92 |
| Diisobutyl phthalate                   | 21,03 |                                        |       |
| Hexadecanoic acid                      | 37,42 |                                        |       |

| HAsel                                      |       | HAcom                                        |       |
|--------------------------------------------|-------|----------------------------------------------|-------|
| Compound                                   | %     | Compound                                     | %     |
| Methyl formate                             | 2,83  | Methyl hydrazine                             | 2,60  |
| Furfural                                   | 4,97  | 2,2'-Bioxirane                               | 0,51  |
| 2-Furanmethanol                            | 0,85  | Furfural                                     | 12,23 |
| 2(5H)-Furanone                             | 0,45  | 2-Furanmethanol                              | 3,00  |
| 2,5-Furandione, dihydro-3-methylene        | 1,49  | 4-Cyclopentene-1,3-dione                     | 0,79  |
| 2-Cyclopenten-1-one, 2-hydroxy-            | 1,64  | 2(5H)-Furanone                               | 1,17  |
| Furfural 5-methyl-                         | 0,37  | 2,5-Furandione, 3-methyl-                    | 4,59  |
| 2-Propen-1-ol                              | 0,54  | 2(3H)-Furanone-5-methyl-                     | 16,97 |
| 2,4-Dihydro-2,5-dimethyl-3(2H)-furan-3-one | 0,73  | Furfural, 5-methyl-                          | 2,52  |
| Furaneol                                   | 0,80  | 2,4-Dihydroxy-2,5-dimethyl-3(2H)-furan-3-one | 1,66  |
| Ethanamine, N-ethyl-N-nitroso              | 0,72  | Alletone                                     | 1,23  |
| Pyranone                                   | 5,28  | 5-Hepten-2-ol, 6-methyl-                     | 4,38  |
| HMF                                        | 78,71 | Ethanamine, N-ethyl-N-nitroso-               | 2,01  |
| Hexadecanoic acid                          | 0,60  | Pyranone                                     | 14,72 |
|                                            |       | HMF                                          | 17,13 |
|                                            |       | Hydroquinone                                 | 6,09  |
|                                            |       | Dodecanoic acid, 3-hydroxy                   | 25,93 |
|                                            |       | Hexadecanoic acid                            | 0,79  |

| HA-EA <sub>sel</sub>                       |       | HA-EA <sub>com</sub>                            |       |
|--------------------------------------------|-------|-------------------------------------------------|-------|
| Methylhydrazine                            | 0,62  | Glycol monoformate                              | 14,27 |
| Glycol monoformate                         | 10,06 | 2-Propenoic acid                                | 0,23  |
| Ethyl cyanoformate                         | 0,10  | Furfural                                        | 4,84  |
| Furfural                                   | 1,28  | 1,5-heptadiene, 2,6-dimethyl-                   | 0,51  |
| Allyl methacrylate                         | 0,19  | 2(5H)-Furanone                                  | 0,64  |
| 2(5H)-Furanone                             | 0,22  | 2,5-Furandione, dihydro-3-methylene             | 22,61 |
| 2,5-Furandione, dihydro-3-methylene        | 17,59 | Furfural-5-methyl-                              | 0,31  |
| 2,4-Dihydro-2,5-dimethyl-3(2H)-furan-3-one | 0,39  | 3-Penten-1-ol, (E)-                             | 0,52  |
| 3-Hydroxy-4,5-dimethylhydro-2(3H)-furanone | 0,17  | 4-Heptanal, (Z)-                                | 0,32  |
| Spirohexan-5-one                           | 0,96  | β-Myrcene                                       | 0,46  |
| Pyranone                                   | 0,78  | 2,5-Furandione, 3,4-dimethyl-                   | 0,39  |
| Benzoic acid                               | 0,93  | 2(3H)-Furanone, dihydro-3-hydroxy-4,4-dimethyl- | 0,52  |
| Monoethyl fumarate                         | 0,82  | 1,7-octadiene, 3-methylene-                     | 0,28  |
| HMF                                        | 1,52  | alpha-ocimene                                   | 0,25  |
| Cumaran                                    | 7,81  | methyl 3-furoate                                | 1,38  |
| Phthalic acid                              | 2,25  | 1-cyclopentene-1-carboxylic acid                | 1,65  |
| 2-Methoxy-4-vinylphenol                    | 1,31  | Diethylnitrosamine                              | 0,69  |
| Phenantrene, 3,6-dimethoxy-9,10-dimethyl-  | 0,25  | Pyranone                                        | 2,53  |
| o-Xenol                                    | 0,11  | Benzoic acid                                    | 1,56  |
| 1,6-Dioxacyclododecane-7,12-dione          | 0,41  | HMF                                             | 14,18 |
| Ddiisobutyl phthalate                      | 0,79  | Hydroquinone                                    | 3,95  |
| Dibutyl phthalate                          | 51,44 | Phthalic acid                                   | 2,11  |
|                                            |       | 4-Vinylguaiacol                                 | 0,95  |
|                                            |       | 3-Penten-1-ol, 4-methyl-                        | 0,33  |
|                                            |       | Isoamyl nitrate                                 | 1,86  |
|                                            |       | Dibutyl phthalate                               | 42,54 |

| HA-SPsel                          |       | HA-SPcom                                                  |       |
|-----------------------------------|-------|-----------------------------------------------------------|-------|
| 2-butenic acid, 2-methyl-         | 30,80 | methylhydrazine                                           | 0,37  |
| oxazolidine, 2,2-diethyl-3-methyl | 2,09  | glycol monoformate                                        | 58,81 |
| 4-hydroxy-2-methylacetophenone    | 1,27  | 1,5-heptadiene, 2,6-dimethyl-                             | 0,20  |
| isoeugenol                        | 1,92  | tiglic acid                                               | 20,27 |
| 1-undecanol                       | 8,64  | pyranone                                                  | 1,35  |
| phenol, 2,4-di-tert-butyl         | 10,13 | benzofuran, 2,3-dihydro = coumaran                        | 2,12  |
| 1,6-dioxacyclododecane-7,12-diene | 2,64  | ether, phenyl vinyl                                       | 0,94  |
| farnesene epoxide, E-             | 5,60  | 5-hepten-3-one, 5-ethyl-4-methyl-                         | 0,50  |
| ethylene dimethacrylate           | 9,19  | 6-hepten-3-one, 4-methyl-                                 | 0,41  |
| diisobutyl phthalate              | 3,22  | 4-acetoxy-3-methoxystyrene                                | 0,41  |
| hexadecanoic acid                 | 13,11 | 4-hydroxy-2-methylacetophenone                            | 0,31  |
| 2-hexanone, 5-methyl-5-nitro      | 3,35  | geranic acid                                              | 1,43  |
| 10-undecyn-1-ol                   | 8,04  | N-methylpyrrolidine-2,2-dicarboxylic acid, dimethyl ester | 0,96  |
|                                   |       | bisabolol oxide B                                         | 3,52  |
|                                   |       | farnesene epoxide, E-                                     | 2,80  |
|                                   |       | decanoic acid                                             | 0,13  |
|                                   |       | phthalic acid, cyclobutyl tridecyl ester                  | 0,44  |
|                                   |       | cyclohexane, (3-methylpentyl)-                            | 0,70  |
|                                   |       | hexadecanoic acid                                         | 3,60  |
|                                   |       | 5-methylhexanenitrile                                     | 0,36  |
|                                   |       | propane, 1,3-dicyclohexyl-2-methyl-                       | 0,38  |

Table S1 Aroma compounds found in “selected” and “commercial” peels and relative extracts

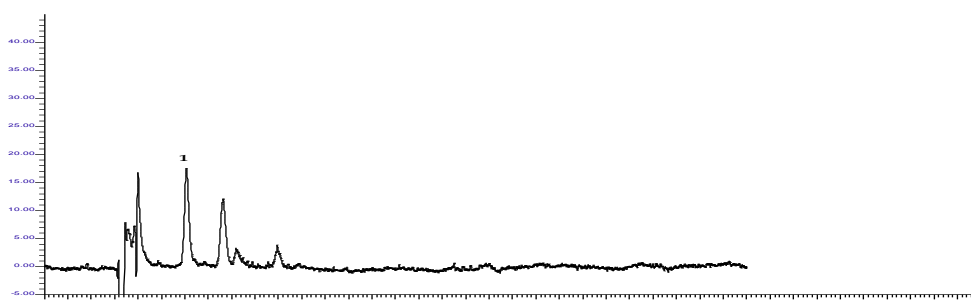

**Figure S2.** Example chromatogram of HE extracts at 450 nm. Peak 1: Lutein.

| mg/g dry extract* |                   |
|-------------------|-------------------|
| HE <sub>sel</sub> | HE <sub>com</sub> |
| 26.98 ± 2.02      | 28.97 ± 1.92      |

\*Carotenoids sum is expressed as lutein equivalents

**Table S2.** HPLC-DAD quantitative analysis of carotenoids in HE<sub>sel</sub> and HE<sub>com</sub>, expressed as sum of the peaks identified at 450 nm. Lutein calibration curve in µg/mL:  $13.29x + 2.46$ ;  $R^2 = 0.9999$ .

| Compound         | Retention time | Calibration curve     | R <sup>2</sup> | λ max | LOD µg/mL |
|------------------|----------------|-----------------------|----------------|-------|-----------|
| Chlorogenic acid | 14.6           | $y = 12.02 x - 3.95$  | 0,9987         | 280   | 8         |
| Catechin         | 15.1           | $y = 5.18 x - 24.29$  | 0,9961         | 280   | 20        |
| Epicatechin      | 16.5           | $y = 2.47 x + 58.32$  | 0,9963         | 280   | 16        |
| Caffeic acid     | 20.0           | $y = 35.23 x - 28.86$ | 0,9989         | 280   | 3         |
| p-Coumaric acid  | 24.7           | $y = 42.12 x - 19.25$ | 0,9995         | 280   | 3         |
| Sinapic acid     | 26.8           | $y = 11,37 x + 9.92$  | 0,9984         | 280   | 8         |
| Ferulic acid     | 27.5           | $y = 20,65 x + 22.96$ | 0,9985         | 280   | 4         |
| Rutin            | 27.4           | $y = 12.55 x + 55.24$ | 0.9997         | 360   | 4         |
| Quercetin-3-gal  | 30.0           | $y = 50,65 x + 21,64$ | 0,9999         | 360   | 2         |
| Myricetin        | 30.6           | $y = 21,51 x - 5,93$  | 0,9990         | 360   | 5         |
| Quercetin        | 36.0           | $y = 21,69 x + 24,12$ | 0,9995         | 360   | 4         |
| Kaempferol       | 42.8           | $y = 25,94 x + 27,50$ | 0,9985         | 360   | 3         |

**Table S3.** Polyphenolic standard compounds taken in to account

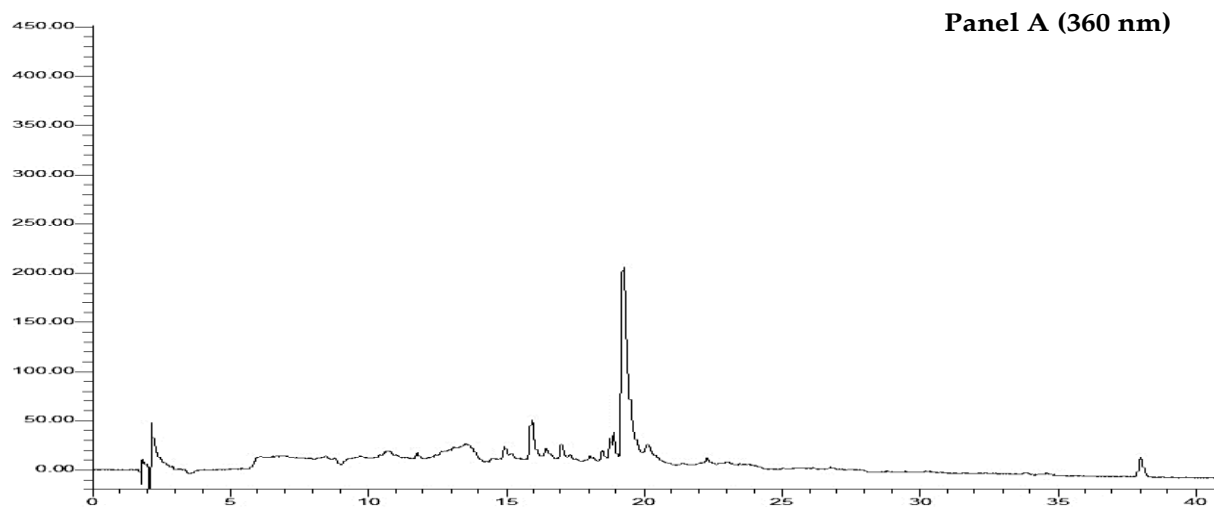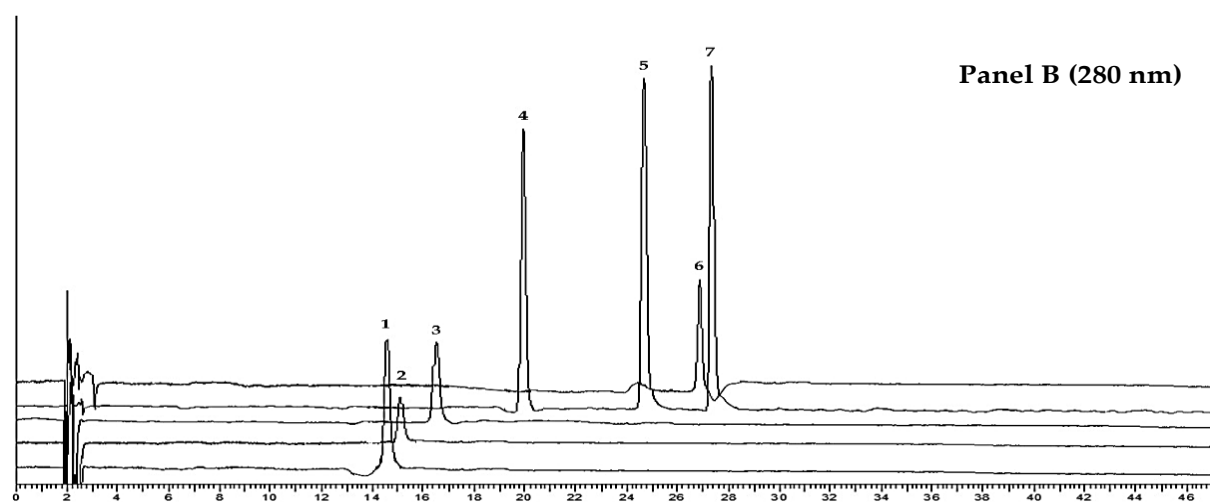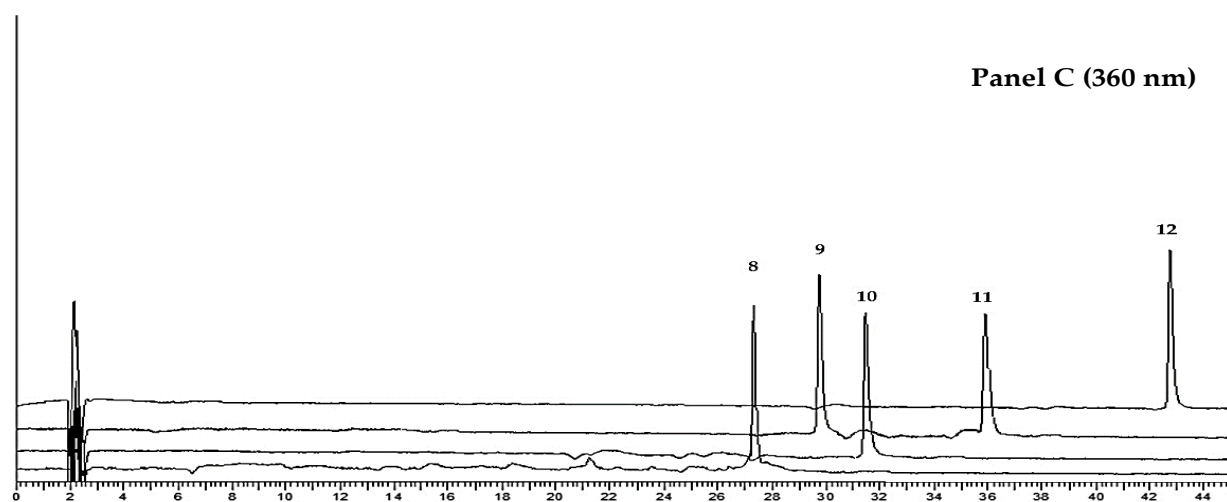

**Figure S3.** Example chromatogram of hydroalcoholic extracts at 360 nm (Panel A), of standard compounds at 280 nm (Panel B, 1. Chlorogenic acid; 2. Catechin; 3. Epicatechin; 4. Caffeic acid; 5. p-Coumaric acid; 6. Sinapic acid; 7. Ferulic acid) and at 360 nm (Panel C, 8. Rutin; 9. Quercetin-3-gal; 10. Myricetin; 11. Quercetin; 12. Kaempferol).
